# Supplementary material for: Selective sensing and visualization of pesticides by ABW-type metal–organic framework based luminescent sensors
Source: PubMed Central journal article supplement — RSC Adv. 2019 Nov 25;9(66):38469–76. doi: 10.1039/c9ra08940c (PMC9075901; doi:10.1039/c9ra08940c), 2019-11-25
Supplement: RA-009-C9RA08940C-s001.pdf [file RA-009-C9RA08940C-s001.pdf]

# Electronic Supplementary Information

## Selective Sensing and Visualization of Pesticides by ABW-Type Metal-Organic Framework Based Luminescent Sensors

Ling Di,<sup>a</sup> Zhengqiang Xia,<sup>b</sup> Jian Li,<sup>a</sup> Zhongxing Geng,<sup>a</sup> Chun Li,<sup>a</sup> Yang Xing<sup>\*a</sup> and Zhanxu Yang<sup>\*a</sup>

<sup>a</sup> College of Chemistry, Chemical Engineering, and Environmental Engineering, Liaoning Shihua University, Fushun 113001, China. E-mail: xingyang@lnpu.edu.cn (Y. Xing); yangzhanxu@lnpu.edu.cn (Z. Yang)

<sup>b</sup> Key Laboratory of Synthetic and Natural Functional Molecule Chemistry of Ministry of Education, College of Chemistry and Materials Science, Northwest University, Xi'an 710127, China

### CONTENTS

|                                                  |   |
|--------------------------------------------------|---|
| Fig. S1                                          | 2 |
| Fig. S2                                          | 3 |
| Fig. S3                                          | 4 |
| Fig. S4                                          | 4 |
| Fig. S5                                          | 4 |
| Fig. S6                                          | 5 |
| Fig. S7                                          | 5 |
| Fig. S8                                          | 6 |
| Table S1                                         | 3 |
| Table S2                                         | 6 |
| X-ray crystallography                            | 2 |
| Fitting formula of luminescent pesticide sensing | 6 |
| Limits of detection                              | 7 |
| References                                       | 7 |

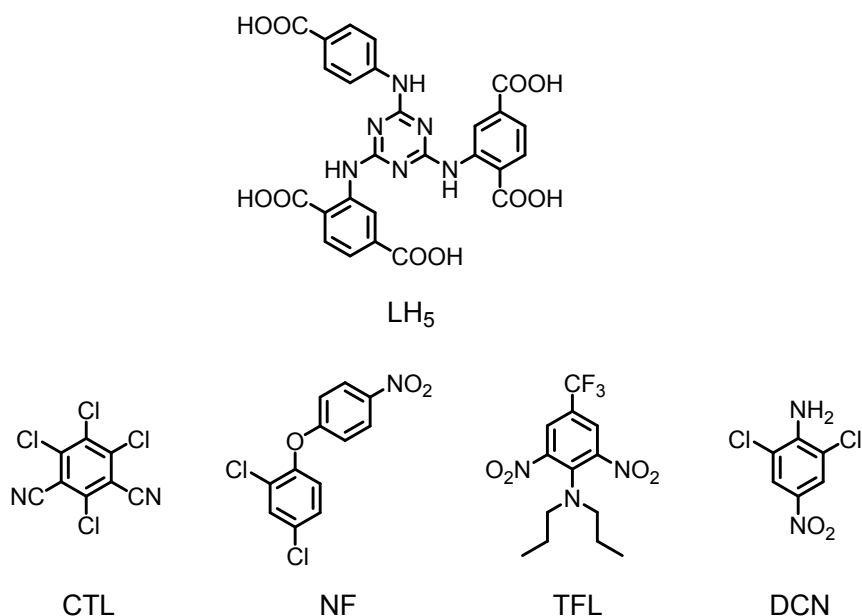

**Fig. S1** Chemical structures of intraligand LH<sub>5</sub> and pesticides

**X-ray crystallography.** Intensity data were obtained by a Mar CCD 165 mm detector on the beamline 3W1A of Beijing Synchrotron Radiation Facility at 153(2) K. The wavelength is 0.80000 Å. The spherical harmonics technique was applied for the absorption effect correction of data. The structure was solved and refined by the SHELXTL.<sup>1</sup> Hydrogen atoms were generated in idealized positions. Because (H<sub>3</sub>O)<sup>+</sup> and the disordered H<sub>2</sub>O could not be modeled explicitly, the PLATON/SQUEEZE<sup>2</sup> program was applied for the calculation of the solvent disorder area and the contribution to the overall intensity data was removed. The residual electron densities of 233 e per formula, which roughly correspond to 1 (H<sub>3</sub>O)<sup>+</sup>, 3 NMP and 6 H<sub>2</sub>O molecules for **1**. CCDC 1554378 contains the supplementary crystallographic data for this paper.

**Table S1.** Selected bond lengths (Å) and angles (°) of **1**.

|                      |            |                     |           |
|----------------------|------------|---------------------|-----------|
| Zn(1)-O(4)#1         | 1.971(4)   | Zn(2)-O(5)          | 1.933(4)  |
| Zn(1)-O(10)#2        | 2.044(4)   | Zn(2)-O(2)          | 1.940(4)  |
| Zn(1)-O(8)#3         | 2.044(4)   | O(4)-Zn(1)#4        | 1.971(4)  |
| Zn(1)-O(1)           | 2.046(4)   | O(7)-Zn(2)#5        | 1.924(4)  |
| Zn(1)-O(11)          | 2.057(5)   | O(8)-Zn(1)#5        | 2.044(4)  |
| Zn(2)-O(9)#2         | 1.880(4)   | O(9)-Zn(2)#6        | 1.880(4)  |
| Zn(2)-O(7)#3         | 1.924(4)   | O(10)-Zn(1)#6       | 2.044(4)  |
|                      |            |                     |           |
| O(4)#1-Zn(1)-O(10)#2 | 129.11(18) | O(7)#3-Zn(2)-O(5)   | 108.3(2)  |
| O(4)#1-Zn(1)-O(8)#3  | 98.35(17)  | O(9)#2-Zn(2)-O(2)   | 112.1(2)  |
| O(10)#2-Zn(1)-O(8)#3 | 132.30(16) | O(7)#3-Zn(2)-O(2)   | 110.3(2)  |
| O(4)#1-Zn(1)-O(1)    | 89.37(16)  | O(5)-Zn(2)-O(2)     | 94.78(16) |
| O(10)#2-Zn(1)-O(1)   | 91.16(17)  | C(5)-O(1)-Zn(1)     | 123.8(3)  |
| O(8)#3-Zn(1)-O(1)    | 94.18(18)  | C(5)-O(2)-Zn(2)     | 144.2(4)  |
| O(4)#1-Zn(1)-O(11)   | 91.2(2)    | C(11)-O(4)-Zn(1)#4  | 125.7(4)  |
| O(10)#2-Zn(1)-O(11)  | 83.37(18)  | C(19)-O(5)-Zn(2)    | 119.3(3)  |
| O(8)#3-Zn(1)-O(11)   | 92.3(2)    | C(18)-O(7)-Zn(2)#5  | 123.9(4)  |
| O(1)-Zn(1)-O(11)     | 173.4(2)   | C(18)-O(8)-Zn(1)#5  | 121.9(3)  |
| O(9)#2-Zn(2)-O(7)#3  | 110.70(19) | C(26)-O(9)-Zn(2)#6  | 121.8(4)  |
| O(9)#2-Zn(2)-O(5)    | 119.51(19) | C(26)-O(10)-Zn(1)#6 | 144.1(4)  |

Symmetry transformations used to generate equivalent atoms. #1 =  $-x+1/2, y-1/2, -z$ ; #2 =  $-x+1, y, -z+1$ ; #3 =  $x, y, z-1$ ; #4 =  $-x, y, -z$ ; #5 =  $x, y, z+1$ ; #6 =  $-x+1/2, y+1/2, -z$ .

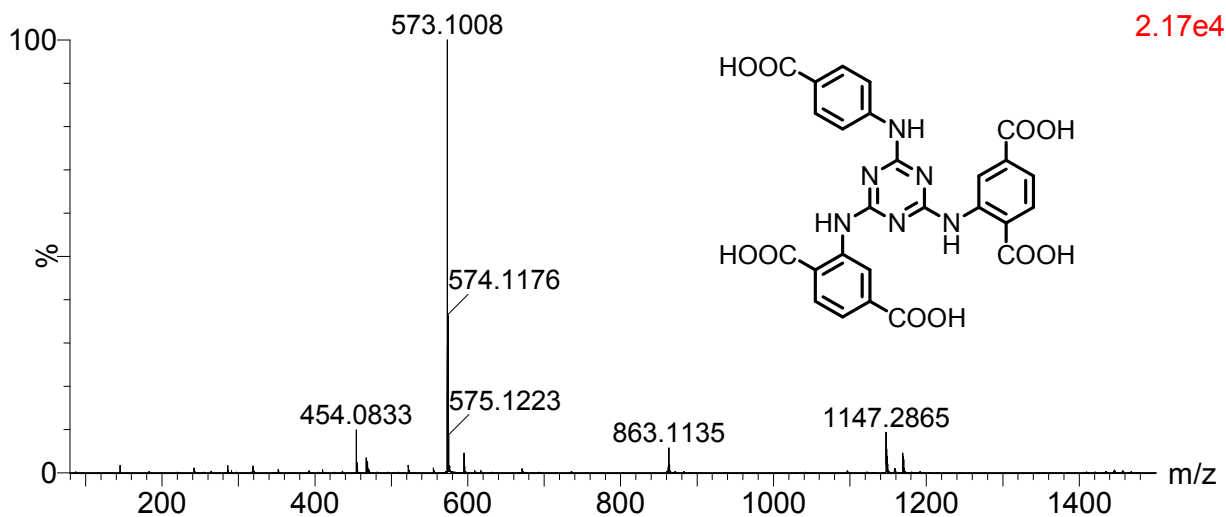**Fig. S2** HRMS spectrum of intraligand LH<sub>5</sub>.

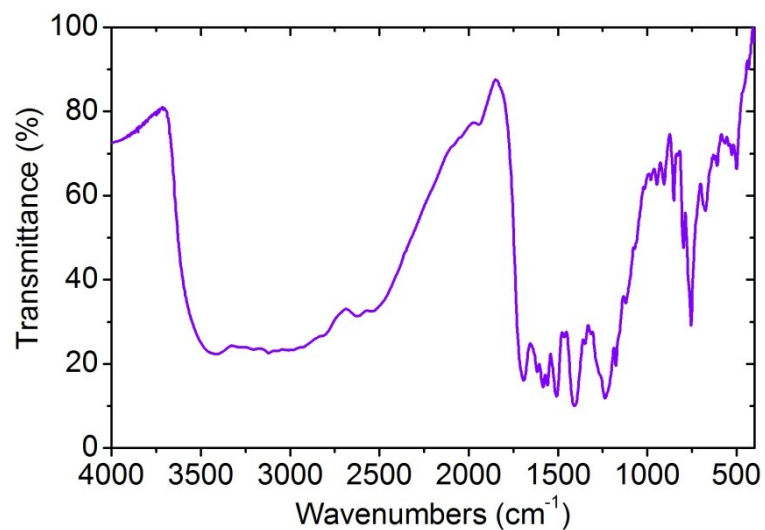

**Fig. S3** IR spectrum of **1**.

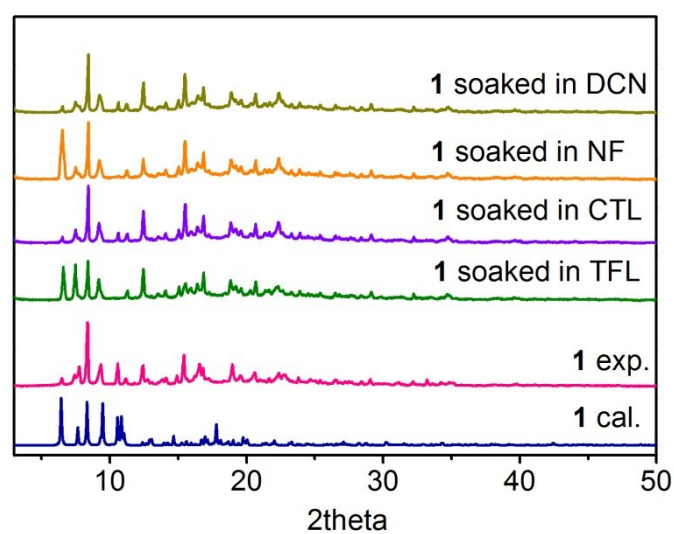

**Fig. S4** PXRD patterns of **1**.

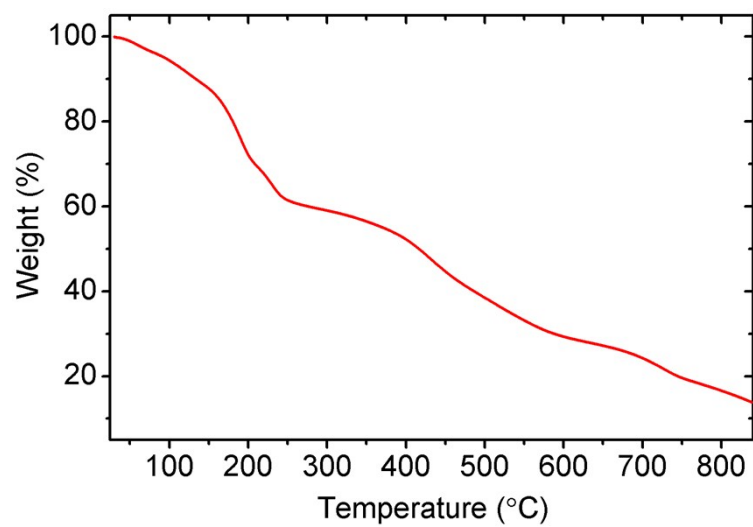

**Fig. S5** TGA curves of **1**.

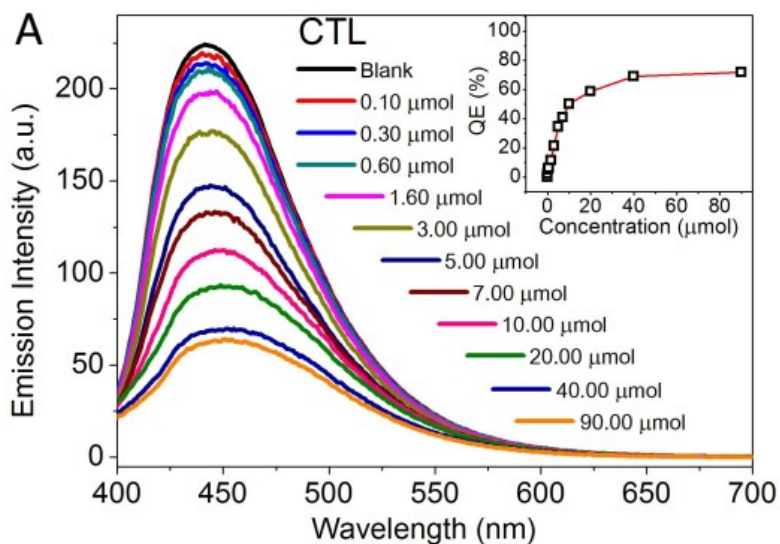

**B**

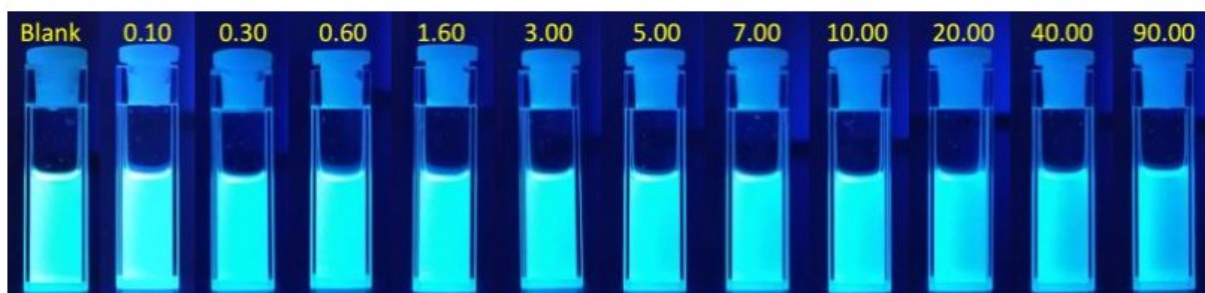

**Fig. S6** (A) Concentration-dependent fluorescence responses of **1(NMP)** with different concentrations of CTL ( $\lambda_{\text{ex}} = 365 \text{ nm}$ ). Inset: luminescent quenching efficiency (QE) versus addition concentration of CTL. (B) Fluorescence variations of **1(NMP)** with step-by-step addition of CTL ( $\mu\text{mol}$ ) under 365 nm UV light.

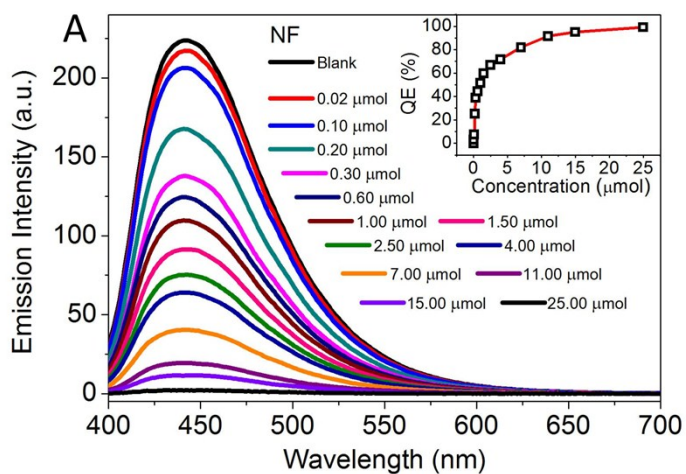

**B**

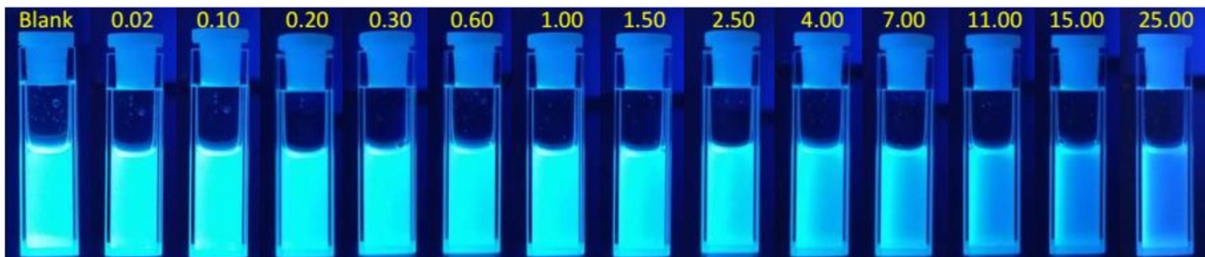

**Fig. S7** (A) Concentration-dependent fluorescence responses of **1(NMP)** with different concentrations of NF ( $\lambda_{\text{ex}} = 365 \text{ nm}$ ). Inset: luminescent quenching efficiency (QE) versus addition concentration of NF. (B) Fluorescence variations of **1(NMP)** with step-by-step addition of NF ( $\mu\text{mol}$ ) under 365 nm UV light.

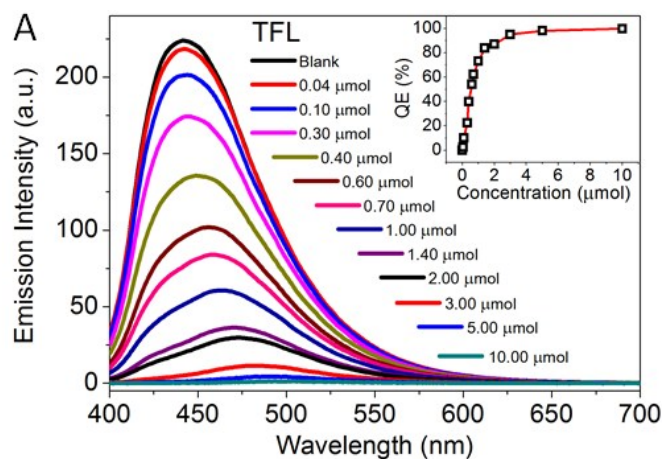

B

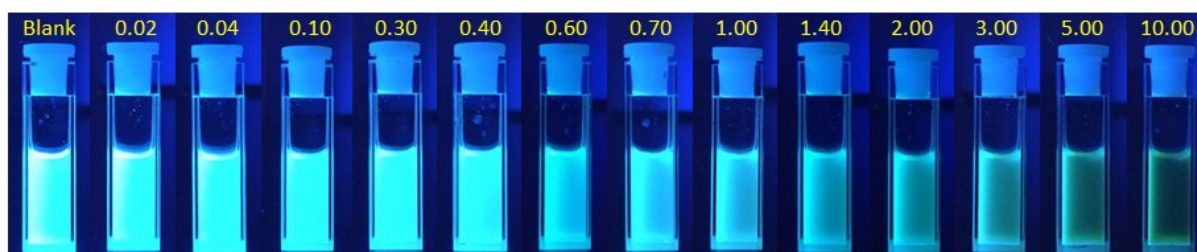

**Fig. S8** (A) Concentration-dependent fluorescence responses of **1**(NMP) with different concentrations of TFL ( $\lambda_{\text{ex}} = 365 \text{ nm}$ ). Inset: luminescent quenching efficiency (QE) versus addition concentration of TFL. (B) Fluorescence variations of **1**(NMP) with step-by-step addition of TFL ( $\mu\text{mol}$ ) under 365 nm UV light.

#### Fitting formula of luminescent pesticide sensing<sup>3-4</sup>

$$\frac{I_0}{I} = \left( \frac{f_1}{1 + K_{\text{SV}} \cdot [Q]} + f_2 \right)^{-1} \quad (\text{Eqn. S1})$$

where  $I_0$  is the original luminescent intensity of **1**(NMP) in the absence of the pesticide,  $I$  is the corresponding value in the presence of the pesticide.  $f_1$  and  $f_2$  are the quenchable and unquenchable fractions, respectively.  $[Q]$  expresses addition concentration ( $\mu\text{mol}$ ) of the pesticide as quencher. The quenching constant  $K_{\text{SV}}$  means the guide of luminescent detection efficiency of the MOF to the pesticides.

**Table S2.** Parameters of **1**(NMP) for luminescent sensing of organic pesticides (fitting of the result to the Stern-Volmer relationship).

| Pesticides | $\lambda_{\text{ex}}$ (nm) | $\lambda_{\text{em}}$ (nm) | $f_1^a$ | $f_2^a$ | $K_{\text{SV}}^b$ ( $\mu\text{mol}^{-1}$ ) | Standard ( $\mu\text{mol}^{-1}$ ) | $R^2$ <sup>c</sup> |
|------------|----------------------------|----------------------------|---------|---------|--------------------------------------------|-----------------------------------|--------------------|
| CTL        | 365                        | 440                        | 0.78    | 0.22    | 0.163                                      | 0.017                             | 0.991              |
| NF         | 365                        | 440                        | 1.06    | -0.06   | 0.574                                      | 0.014                             | 0.999              |
| TFL        | 365                        | 440                        | 1.02    | -0.02   | 6.072                                      | 0.682                             | 0.995              |
| DCN        | 365                        | 440                        | 1.04    | -0.04   | 11.194                                     | 0.345                             | 0.999              |

<sup>a</sup> Ratio of the two portions of **1**(NMP). <sup>b</sup> Quenching constant ( $\text{bar}^{-1}$ ). <sup>c</sup> Determination coefficients.

### Limits of detection (LODs)<sup>3</sup>

$$LOD (ppm) = \frac{(S/N) \times 10^3}{K_{SV} \times V}$$

S/N: signal to noise ratio       $S/N = 20\log(U_1/U_0)$

$U_1$ : signal amplitude     $U_0$ : noise amplitude

$U_1 = 223.439$ ,  $U_0 = 0.167$ ,  $S/N = 65.528$  for **1**(NMP)

V: The volume of **1**(NMP),  $V = 2000 \mu\text{L}$

The LODs of **1**(NMP) for luminescent sensing of CTL, NF, TFL, and DCN:

**CTL**: LOD = 201.01 ppm

**NF**: LOD = 57.08 ppm

**TFL**: LOD = 5.40 ppm

**DCN**: LOD = 2.93 ppm

### References.

- 1 G. M. Sheldrick, *SHELXL-97, Program for X-ray Crystal Structure Refinement*, University of Göttingen, Göttingen, (Germany), 1997.
- 2 A. L. Spek, *PLATON, Multipurpose Crystallographic Tool*, Utrecht University, Utrecht, The Netherlands, 2008.
- 3 X. D. Wang and O. S. Wolfbeis, *Chem. Soc. Rev.*, 2014, **43**, 3666.
- 4 L. Di, Y. Xing, X. Wang, D. Zheng, Y. Yang and F. Li, *RSC Adv.*, 2018, **8**, 41040.
